# Supplementary material for: Licochalcone A improves the cognitive ability of mice by regulating T- and B-cell proliferation
Source: Aging (Albany NY). 2021 Mar 10;13(6):8895–915. doi: 10.18632/aging.202704 (PMC8034954; doi:10.18632/aging.202704)
Supplement: Supplementary Figures [file aging-13-202704-s001.pdf]

## SUPPLEMENTARY FIGURES

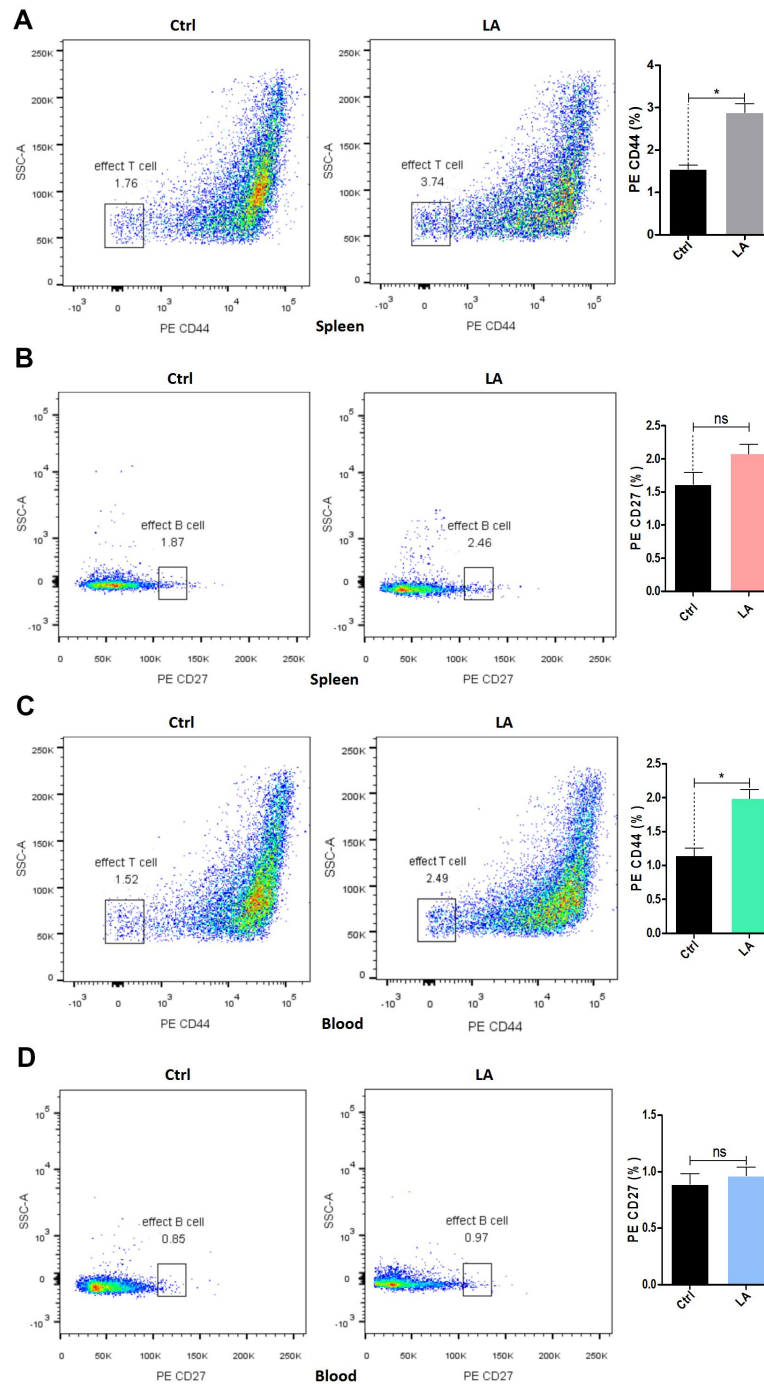

**Supplementary Figure 1. LA effect on effector T- and B-cell proliferation in the spleen and whole blood in C57BL/6 mice. (A)** Effector T-cell proliferation in the spleen of LA- or control (Ctrl)-treated mice. **(B)** Effector B-cell proliferation in the spleen of LA- or control (Ctrl)-treated mice. **(C)** Effector T-cell proliferation in the whole blood of LA- or control (Ctrl)-treated mice. **(D)** Effector B-cell proliferation in the whole blood of LA- or control (Ctrl)-treated mice. The data are presented as the mean  $\pm$  SD of three independent experiments. Statistical significance was determined using unpaired t-tests. \* $p < 0.05$ , \*\* $p < 0.01$  compared with the Ctrl group.

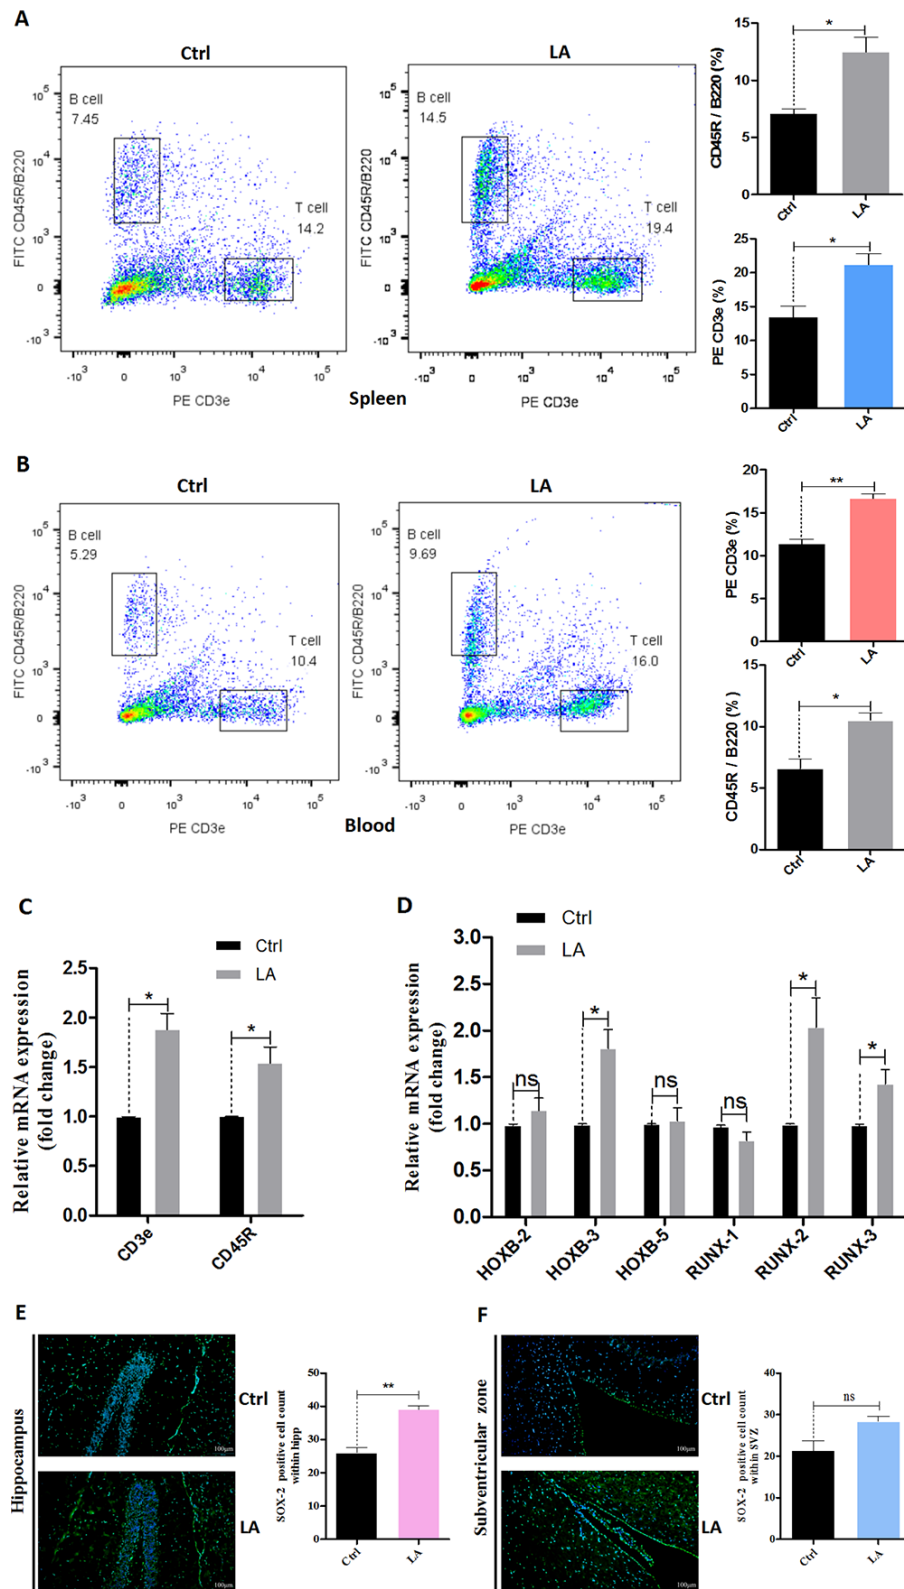

**Supplementary Figure 2. Effect of LA on lymphocyte proliferation *in vitro*.** (A, B) Proliferation of LA-treated or control (Ctrl)-treated *in vitro* cultured T and B cells from the spleen (A) or whole blood (B) of C57BL/6 mice. (C) Relative mRNA expression of *in vitro* splenic lymphocytes. (D) Relative mRNA expression of genes that might regulate lymphocyte proliferation. (E, F) Expression of the neural stem cell marker *SOX-2* in the hippocampus (Hipp) (E) and SVZ (F) of C57BL/6 mice. The data are presented as the mean $\pm$ SD of three independent experiments. Statistical significance was determined using unpaired *t*-tests. \**p* < 0.05, \*\**p* < 0.01, as compared with the Ctrl.

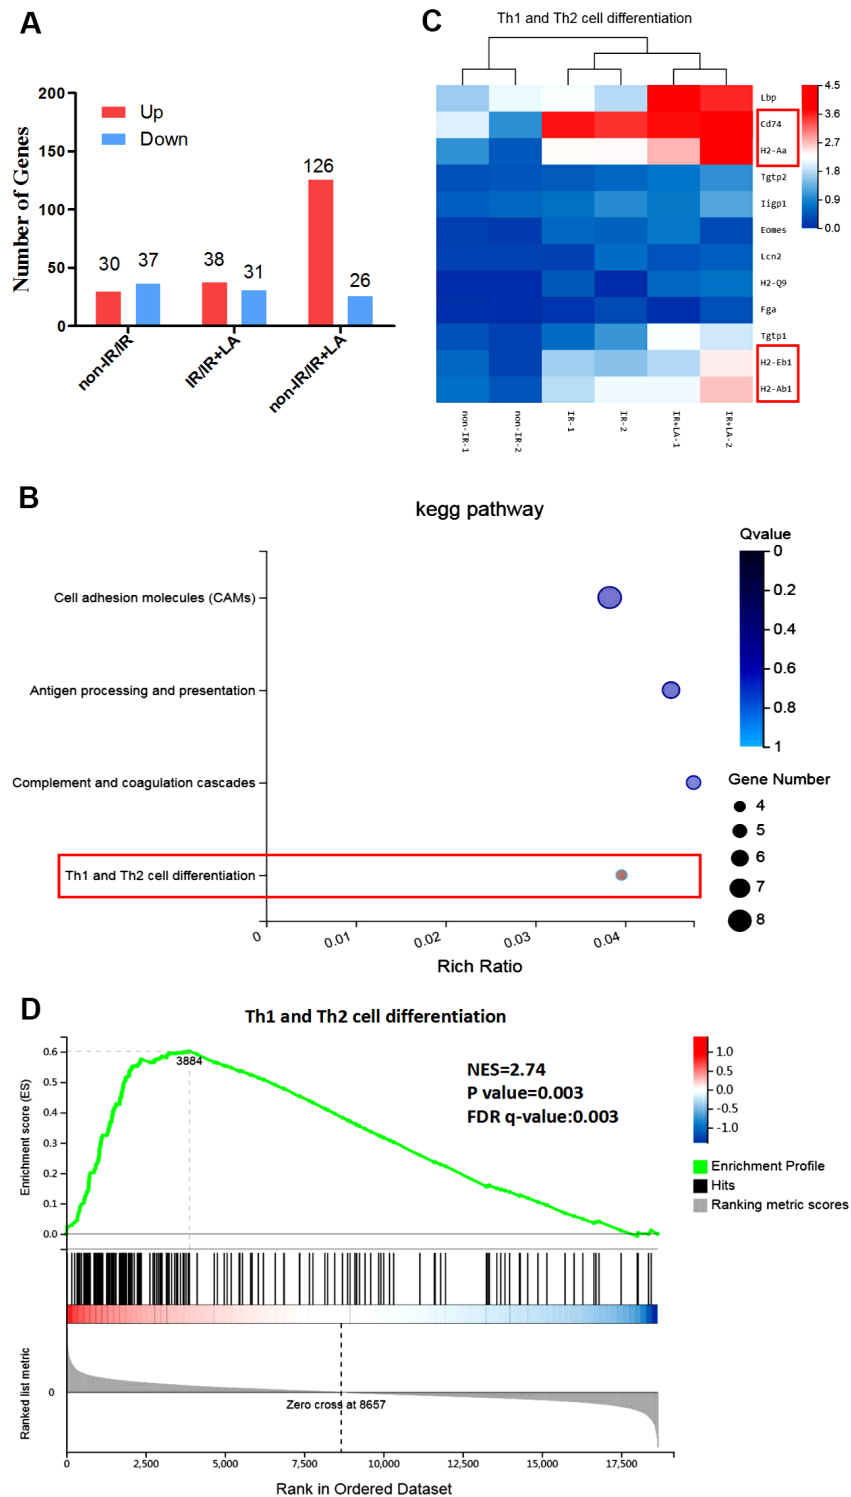

**Supplementary Figure 3. Exploring the mechanism by which LA regulates the immune system by performing RNA-seq on the hippocampus of B-NDG mice.** (A) The differentially expressed genes between non-IR and IR PBS-treated mice, between non-IR PBS-treated mice and IR LA-treated (IR+LA) mice, and between IR PBS-treated mice and IR+LA mice. (B) A bubble diagram showing the Th1- and Th2-cell differentiation signaling pathway regulated by LA treatment. (C) Heatmap showing the differentially expressed genes related to the Th1- and Th2-cell differentiation signaling pathway. (D) Enrichment plots of gene expression signatures for Th1- and Th2-cell differentiation. Barcode plot indicates the positions of genes in each gene-set. NES, normalized enrichment score. The data are presented as the mean $\pm$ SD of three independent experiments. Statistical significance was determined using unpaired *t*-tests. \**p* < 0.05, \*\**p* < 0.01, as compared with the control.

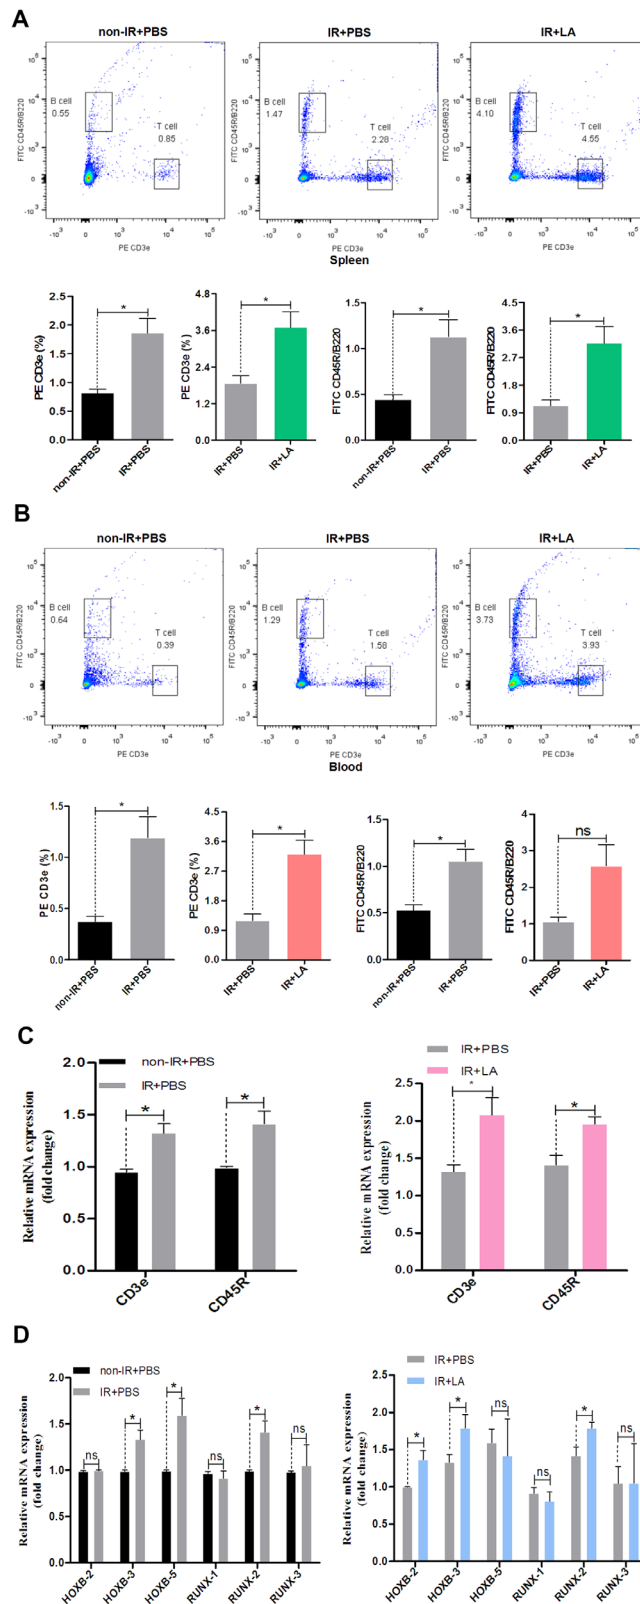

**Supplementary Figure 4. The effect of LA on the *in vitro* proliferation of lymphocytes from B-NDG mice.** (A, B) Proliferation of LA-treated or PBS-treated *in vitro* cultured T and B cells from the spleen (A) or whole blood (B) of IR B-NDG mice. (C) The relative mRNA expression of CD3e and CD45R. (D) Relative mRNA expression of genes that might regulate lymphocyte proliferation. The data are presented as the mean $\pm$ SD of three independent experiments. Statistical significance was determined using unpaired *t*-tests. \**p* < 0.05, \*\**p* < 0.01, as compared with the Ctrl.
